# Supplementary material for: Endothelium-specific deletion of amyloid-β precursor protein exacerbates endothelial dysfunction induced by aging
Source: Aging (Albany NY). 2021 Aug 12;13(15):19165–85. doi: 10.18632/aging.203401 (PMC8386539; doi:10.18632/aging.203401)
Supplement: Supplementary Figures [file aging-13-203401-s001.pdf]

## SUPPLEMENTARY FIGURES

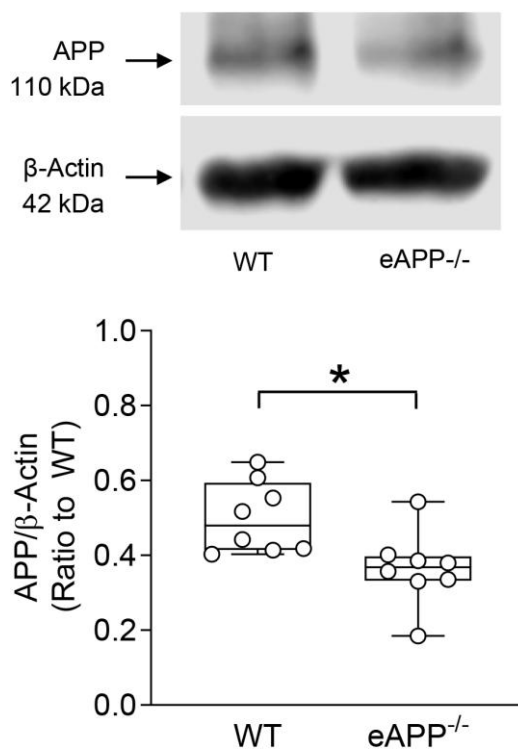

**Supplementary Figure 1. APP expression in the aortas of young wild-type (WT) littermates and eAPP<sup>-/-</sup> mice.** Western blots were performed in separate studies, and results are the relative densitometry compared with  $\beta$ -actin protein. All data are representing box plots with whiskers showing the median, 25<sup>th</sup> to 75<sup>th</sup> percentiles, and min-max range (n=8). \*P<0.05 vs. WT littermates (unpaired t-test).

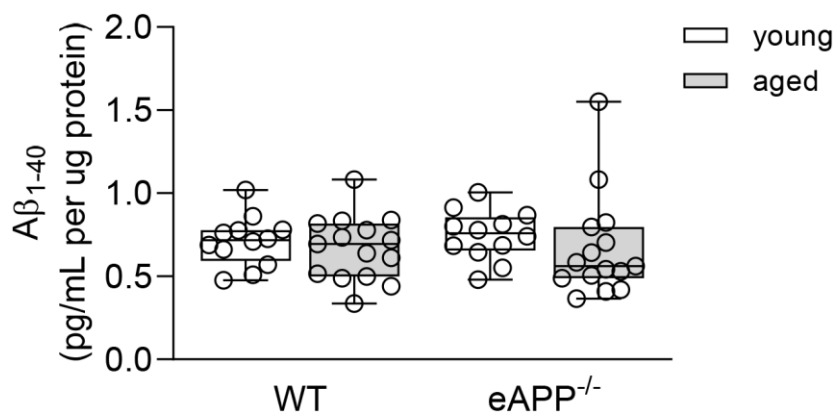

**Supplementary Figure 2. Effects of aging on *ex-vivo* amyloid- $\beta$  1-40 (A $\beta$ <sub>1-40</sub>) secretion from wild-type (WT) littermates and eAPP<sup>-/-</sup> mice aortas.** The supernatants were collected and analyzed for A $\beta$ <sub>1-40</sub> levels. The results were normalized against tissue protein levels (n=12 per group for young WT littermates and eAPP<sup>-/-</sup> mice and n=15 per group for aged WT littermates and eAPP<sup>-/-</sup> mice. All data are representing box plots with whiskers showing the median, 25<sup>th</sup> to 75<sup>th</sup> percentiles, and min-max range. P>0.05 (two-way ANOVA followed by Tukey's HSD test).

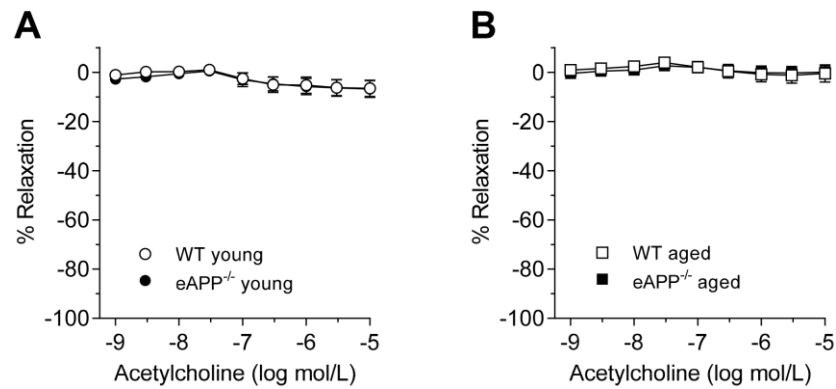

**Supplementary Figure 3.** Effects of L-NAME ( $3 \times 10^{-4}$  mol/L) on endothelium-dependent relaxations to acetylcholine in young (**A**;  $n=9$  per group) and aged (**B**;  $n=7$  per group) wild-type (WT) littermates and eAPP<sup>-/-</sup> mice aortas in the presence of indomethacin ( $10^{-5}$  mol/L). Results are shown as mean  $\pm$  SEM and expressed as percent relaxation from submaximal contractions to PGF<sub>2 $\alpha$</sub>  ( $3 \times 10^{-6}$ - $8 \times 10^{-6}$  mol/L).

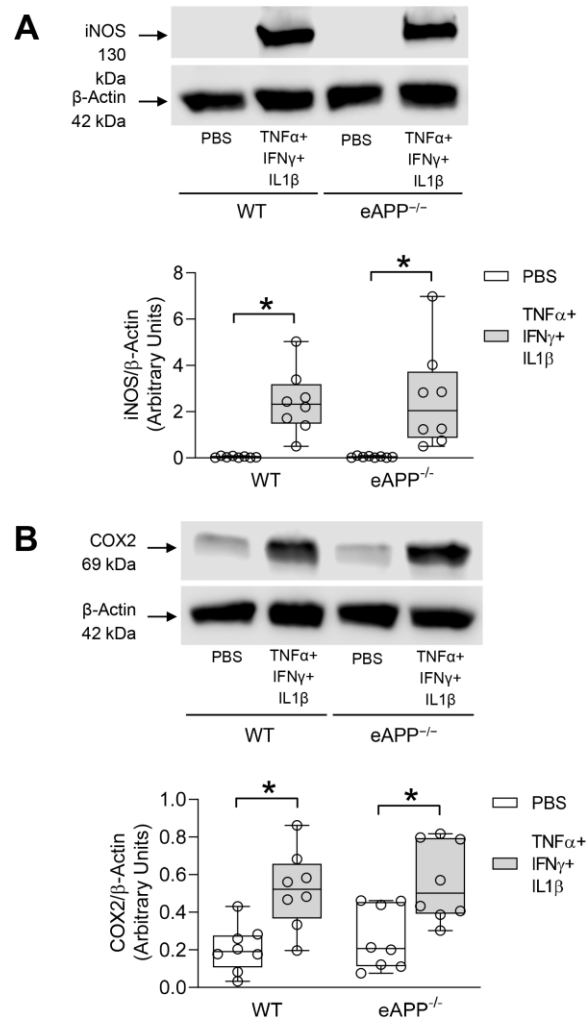

**Supplementary Figure 4.** Effects *ex-vivo* treatment for 24 hours with cytokine cocktail (consisting TNF $\alpha$ , IFN $\gamma$ , and IL-1 $\beta$ ) on iNOS (**A**,  $n=8$  per group) and COX2 (**B**,  $n=8$  per group) protein expressions of young wild-type (WT) littermates and eAPP<sup>-/-</sup> mice aortas. Western blot results are the relative densitometry compared with  $\beta$ -actin protein. All results are representing box plots with whiskers showing the median, 25<sup>th</sup> to 75<sup>th</sup> percentiles, and min-max range. \*  $P < 0.05$  versus young mice of same strain (two-way ANOVA followed by Tukey's HSD test).

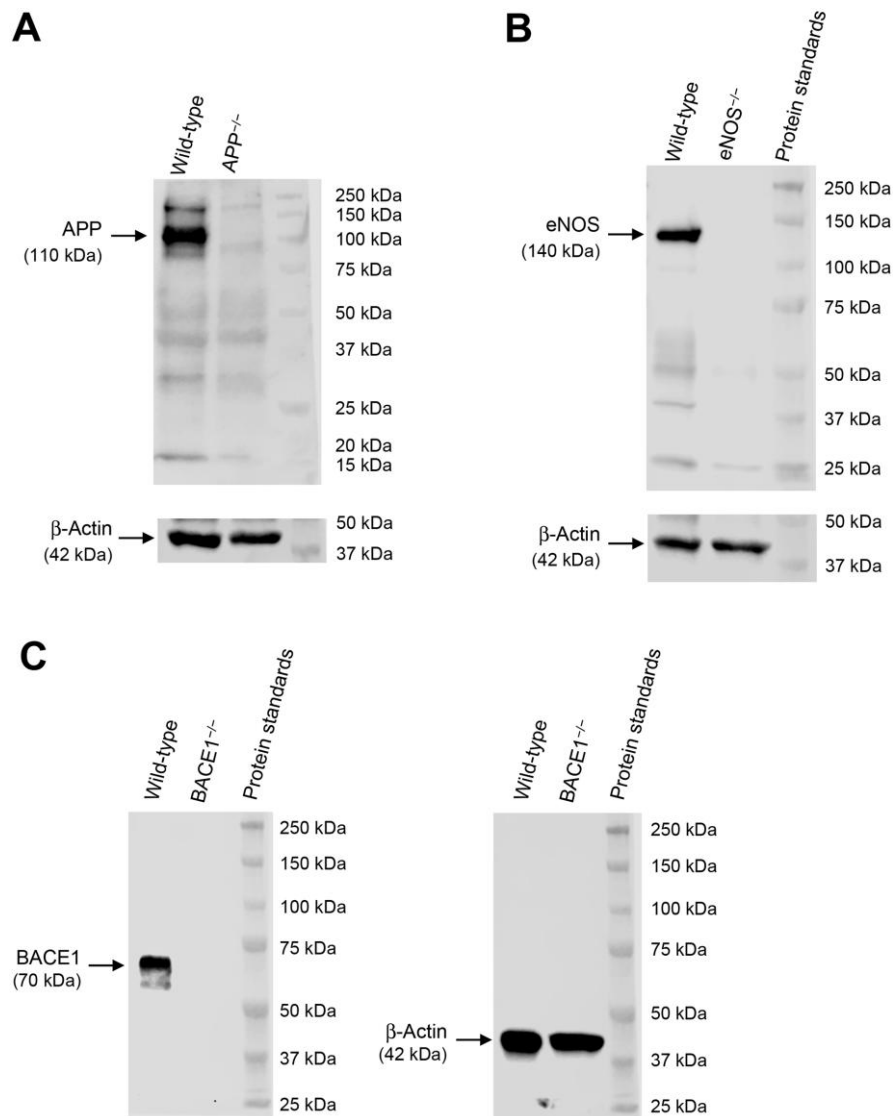

**Supplementary Figure 5. Western blot analyses for validation of primary antibodies.** (A) The selectivity of APP antibody was examined in *APP*<sup>-/-</sup> mice aortas (Stock no. 004133, The Jackson Laboratory). (B) The selectivity of eNOS antibody was examined in *eNOS*<sup>-/-</sup> mice aortas (Stock no. 002684, The Jackson Laboratory). (C) The selectivity of BACE1 antibody was examined in *BACE1*<sup>-/-</sup> mice aortas (Stock no. 004714, The Jackson Laboratory). As loading controls, all blots were reprobed with β-actin.

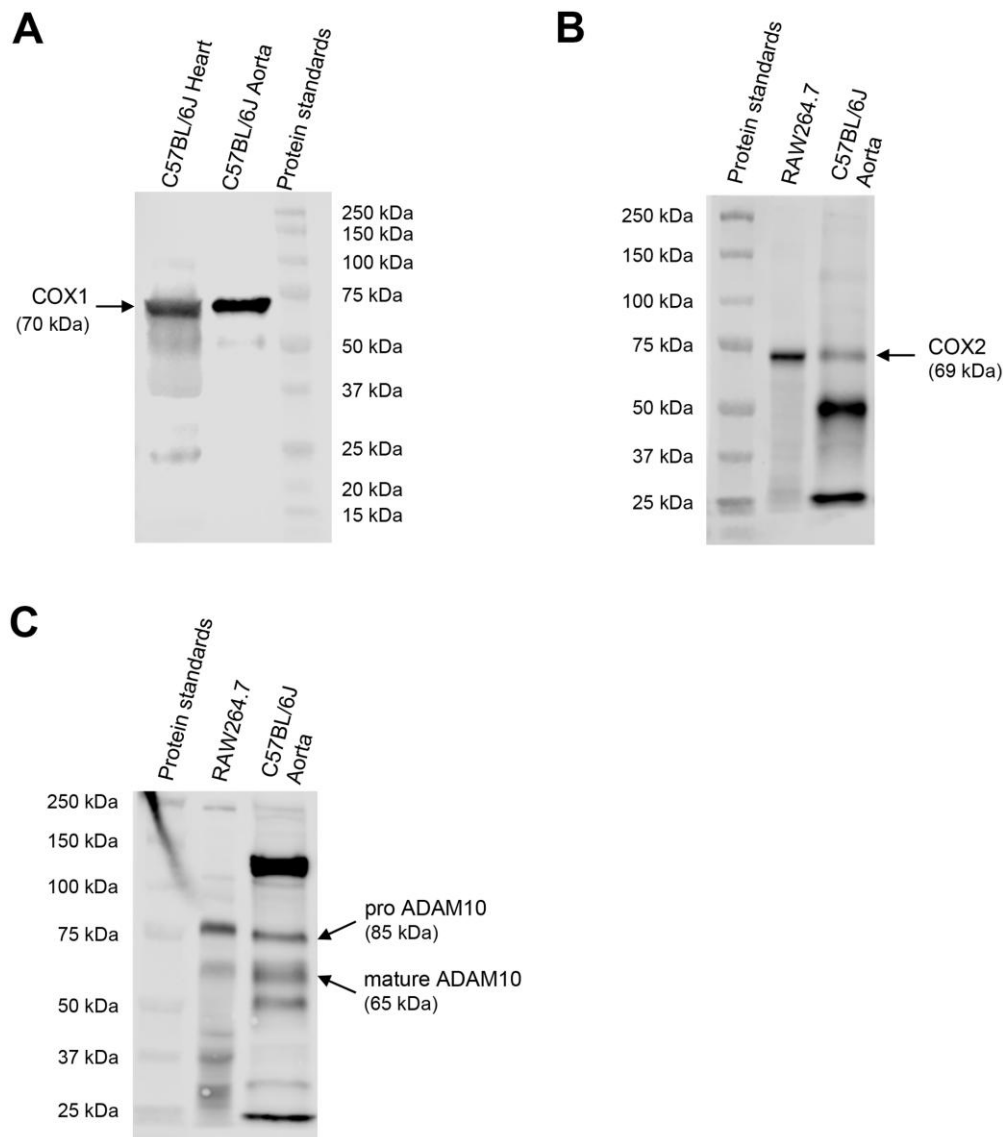

**Supplementary Figure 6. Western blot analyses for validation of primary antibodies.** (A) Wild-type mouse heart was used as positive control to identify COX1 band. (B) RAW264.7 whole cell lysate (no. ab7187, Abcam) was used as positive control for COX2 antibody. C57BL/6J aorta was incubated with cytokine cocktail (consisting TNF $\alpha$ , IFN $\gamma$ , and IL-1 $\beta$ ) for 24 hours (see method section for details) to induce COX2 expression. (C) Positive control RAW264.7 whole cell lysate (no. ab7187, Abcam) was used for selectivity of pro- and mature forms of ADAM10 bands.
